# Supplementary material
Source: MDPI journal article supplement (https://www.mdpi.com/2304-6740/12/2/40)
Supplement: s1 [file s1]

*Supporting Information for*

# Geometries, Electronic Structures, Bonding Properties, and Stability Strategy of Endohedral Metallofullerenes $\text{TM}@\text{C}_{28}$ (TM = Sc<sup>-</sup>, Y<sup>-</sup>, La<sup>-</sup>, Ti, Zr, Hf, V<sup>+</sup>, Nb<sup>+</sup>, Ta<sup>+</sup>)

Dong Liu, Yuan Shui and Tao Yang \*

MOE Key Laboratory for Non-Equilibrium Synthesis and Modulation of Condensed Matter, School of Physics, Xi'an Jiaotong University, Xi'an 710049, Shaanxi, China; dliu\_sd@stu.xjtu.edu.cn (D.L.); f24270216f@stu.xjtu.edu.cn (Y.S.)

\* Correspondence: taoyang1@xjtu.edu.cn

**Keywords:** fullerenes; quantum-chemical calculations; chemical bonding; stability

## Contents

- I. The Necessity of Clustering Algorithms
- II. Atomic Multiplicity
- III. The Energy relationship of  $[\text{V}@\text{C}_{28}]^+ - (\text{CF}_3)_{n=1,2}$
- IV. EDA analysis
- V. Cartesian coordinates of optimized structures

## I. The Necessity of Clustering Algorithms

In our conformational search strategy, the generation of an extensive set of structures necessitates the implementation of clustering algorithms. While smaller fullerene cages, such as the ones we studied, are often considered to have limited conformational possibilities due to their inherent symmetry, the process of randomly placing transition metal (TM) atoms can disrupt this symmetry. To effectively manage this, we employed the ISOSTAT module of the Molclus software for clustering purposes. This module categorizes structures as identical if they exhibit an energy difference less than 0.25 kcal/mol and a geometric deviation smaller than 0.1 Ångström.

Although strict symmetry constraints would theoretically consolidate most structures into a single category, our research methodology rigorously validates this assumption from another perspective. By allowing for the perturbation of symmetry through the random placement of TM atoms and subsequently clustering the resulting structures, our approach not only adheres to the principles of thoroughness but also provides a robust framework for analyzing the nuanced variations in structural configurations, even within the constraints of presumed symmetry.

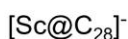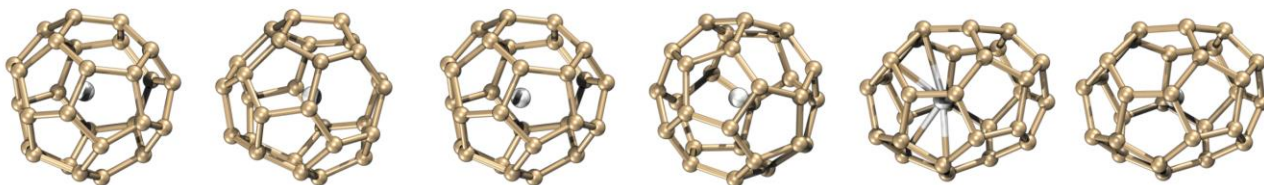

|   |   |        |   |    |                   |        |      |     |                |
|---|---|--------|---|----|-------------------|--------|------|-----|----------------|
| # | 1 | Count: | 1 | E= | -1826.204999 a.u. | DGmin= | 0.09 | DE= | 0.00 kcal/mol  |
| # | 2 | Count: | 1 | E= | -1826.203529 a.u. | DGmin= | 0.09 | DE= | 0.92 kcal/mol  |
| # | 3 | Count: | 1 | E= | -1826.202567 a.u. | DGmin= | 0.04 | DE= | 1.53 kcal/mol  |
| # | 4 | Count: | 1 | E= | -1826.200289 a.u. | DGmin= | 0.04 | DE= | 2.96 kcal/mol  |
| # | 5 | Count: | 1 | E= | -1826.093020 a.u. | DGmin= | 0.23 | DE= | 70.27 kcal/mol |
| # | 6 | Count: | 2 | E= | -1826.080677 a.u. | DGmin= | 0.23 | DE= | 78.01 kcal/mol |

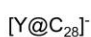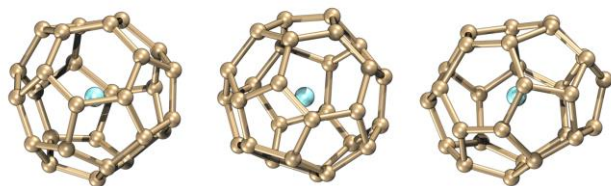

|   |   |        |   |    |                   |        |      |     |                |
|---|---|--------|---|----|-------------------|--------|------|-----|----------------|
| # | 1 | Count: | 1 | E= | -1104.016569 a.u. | DGmin= | 0.00 | DE= | 0.00 kcal/mol  |
| # | 2 | Count: | 1 | E= | -1104.014396 a.u. | DGmin= | 0.00 | DE= | 1.36 kcal/mol  |
| # | 3 | Count: | 1 | E= | -1103.879526 a.u. | DGmin= | 0.39 | DE= | 86.00 kcal/mol |

[La@C<sub>28</sub>]<sup>-</sup>

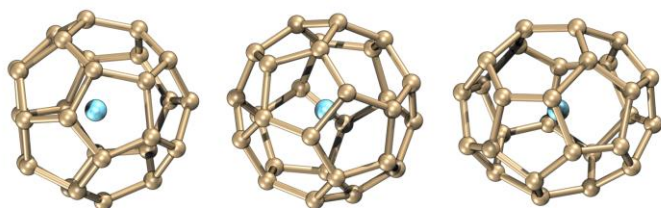

# 1 Count: 1 E= -1097.153169 a.u. DGmin= 0.00 DE= 0.00 kcal/mol  
 # 2 Count: 1 E= -1097.150827 a.u. DGmin= 0.00 DE= 1.47 kcal/mol  
 # 3 Count: 1 E= -1097.007882 a.u. DGmin= 0.30 DE= 91.17 kcal/mol

[Ti@C<sub>28</sub>]

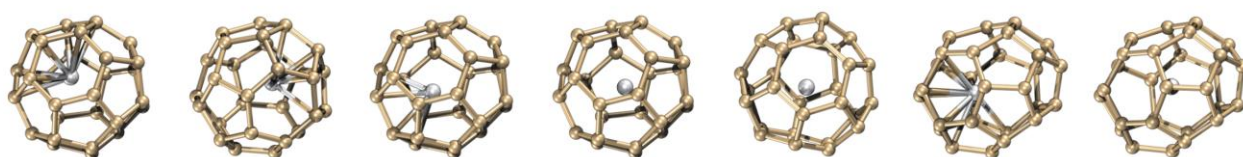

# 1 Count: 2 E= -1914.846363 a.u. DGmin= 0.15 DE= 0.00 kcal/mol  
 # 2 Count: 1 E= -1914.841368 a.u. DGmin= 0.15 DE= 3.13 kcal/mol  
 # 3 Count: 1 E= -1914.835625 a.u. DGmin= 0.15 DE= 6.74 kcal/mol  
 # 4 Count: 1 E= -1914.791882 a.u. DGmin= 0.00 DE= 34.19 kcal/mol  
 # 5 Count: 1 E= -1914.789637 a.u. DGmin= 0.00 DE= 35.60 kcal/mol  
 # 6 Count: 2 E= -1914.758673 a.u. DGmin= 0.11 DE= 55.03 kcal/mol  
 # 7 Count: 1 E= -1914.689809 a.u. DGmin= 0.31 DE= 98.24 kcal/mol

[Zr@C<sub>28</sub>]

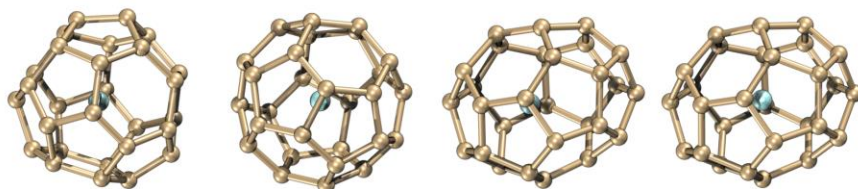

# 1 Count: 1 E= -1112.664208 a.u. DGmin= 0.06 DE= 0.00 kcal/mol  
 # 2 Count: 1 E= -1112.663033 a.u. DGmin= 0.06 DE= 0.74 kcal/mol  
 # 3 Count: 2 E= -1112.537737 a.u. DGmin= 0.22 DE= 79.36 kcal/mol  
 # 4 Count: 1 E= -1112.526782 a.u. DGmin= 0.22 DE= 86.24 kcal/mol

# Hf@C<sub>28</sub>

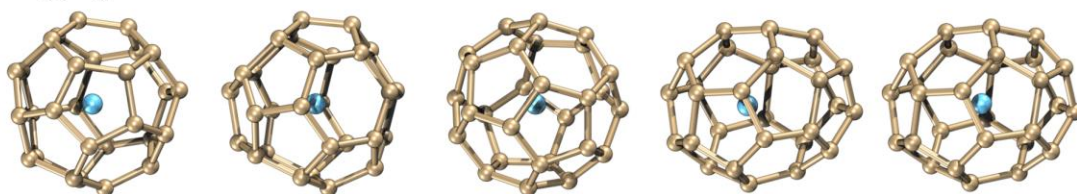

|   |   |        |   |    |                   |        |      |     |                |
|---|---|--------|---|----|-------------------|--------|------|-----|----------------|
| # | 1 | Count: | 1 | E= | -1113.622176 a.u. | DGmin= | 0.00 | DE= | 0.00 kcal/mol  |
| # | 2 | Count: | 1 | E= | -1113.621069 a.u. | DGmin= | 0.06 | DE= | 0.69 kcal/mol  |
| # | 3 | Count: | 1 | E= | -1113.619901 a.u. | DGmin= | 0.00 | DE= | 1.43 kcal/mol  |
| # | 4 | Count: | 1 | E= | -1113.494971 a.u. | DGmin= | 0.22 | DE= | 79.82 kcal/mol |
| # | 5 | Count: | 1 | E= | -1113.486307 a.u. | DGmin= | 0.22 | DE= | 85.26 kcal/mol |

# [V@C<sub>28</sub>]<sup>+</sup>

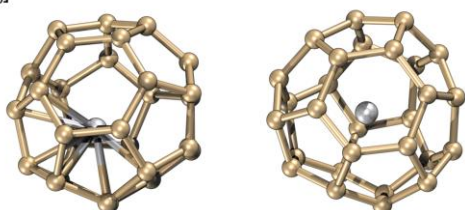

|   |   |        |   |    |                   |        |      |     |               |
|---|---|--------|---|----|-------------------|--------|------|-----|---------------|
| # | 1 | Count: | 1 | E= | -2009.094067 a.u. | DGmin= | 0.20 | DE= | 0.00 kcal/mol |
| # | 2 | Count: | 1 | E= | -2009.088121 a.u. | DGmin= | 0.20 | DE= | 3.73 kcal/mol |

# [Ta@C<sub>28</sub>]<sup>+</sup>

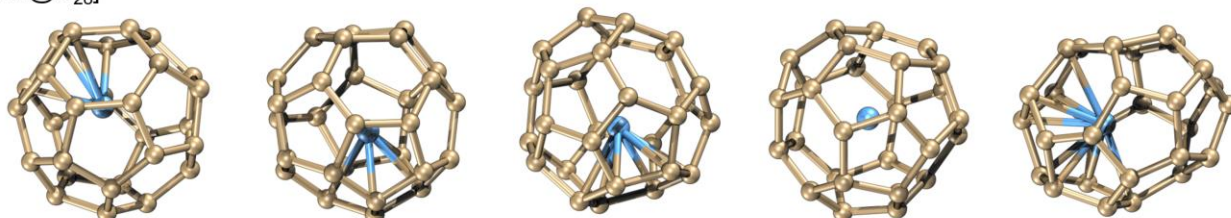

|   |   |        |   |    |                   |        |      |     |                |
|---|---|--------|---|----|-------------------|--------|------|-----|----------------|
| # | 1 | Count: | 1 | E= | -1122.336838 a.u. | DGmin= | 0.09 | DE= | 0.00 kcal/mol  |
| # | 2 | Count: | 2 | E= | -1122.334526 a.u. | DGmin= | 0.09 | DE= | 1.45 kcal/mol  |
| # | 3 | Count: | 1 | E= | -1122.332007 a.u. | DGmin= | 0.11 | DE= | 3.03 kcal/mol  |
| # | 4 | Count: | 1 | E= | -1122.316437 a.u. | DGmin= | 0.24 | DE= | 12.80 kcal/mol |
| # | 5 | Count: | 2 | E= | -1122.238304 a.u. | DGmin= | 0.46 | DE= | 61.83 kcal/mol |

## II. Atomic Multiplicity

**Table S1.** The atomic (ionic) energies (in eV) calculated using PBE-D3(BJ)/def2-TZVPPD, with red indicating the ground state.

|                 | Singlet | Triplet | Quintet | Septet |
|-----------------|---------|---------|---------|--------|
| Sc <sup>-</sup> | 0.89    | 0.00    | 3.61    | 27.25  |
| Y <sup>-</sup>  | 0.73    | 0.00    | 0.88    | 24.18  |
| La <sup>-</sup> | 0.71    | 0.00    | 0.67    | 17.87  |
| Ti              | 2.07    | 0.39    | 0.00    | 29.84  |
| Zr              | 1.18    | 0.05    | 0.00    | 26.11  |
| Hf              | 1.06    | 0.00    | 1.00    | 29.15  |
| V <sup>+</sup>  | 2.90    | 1.15    | 0.00    | 33.64  |
| Nb <sup>+</sup> | 2.45    | 0.98    | 0.00    | 29.34  |
| Ta <sup>+</sup> | 2.28    | 0.88    | 0.00    | 31.84  |

### III. The Energy relationship of $[V@C_{28}]^+ - (CF_3)_{n=1,2}$

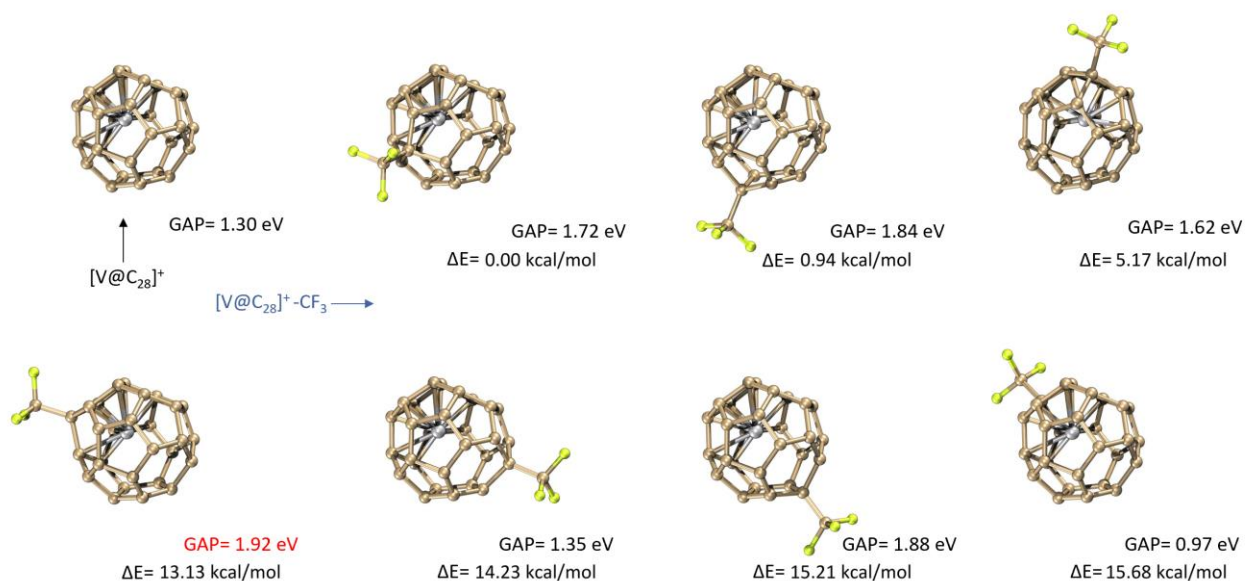

**Figure S1.** The HOMO-LUMO GAP after attaching a  $CF_3$  group to  $[V@C_{28}]^+$  and the energy differences between different isomers, at the PBE-D3(BJ)/def2-SVP level.

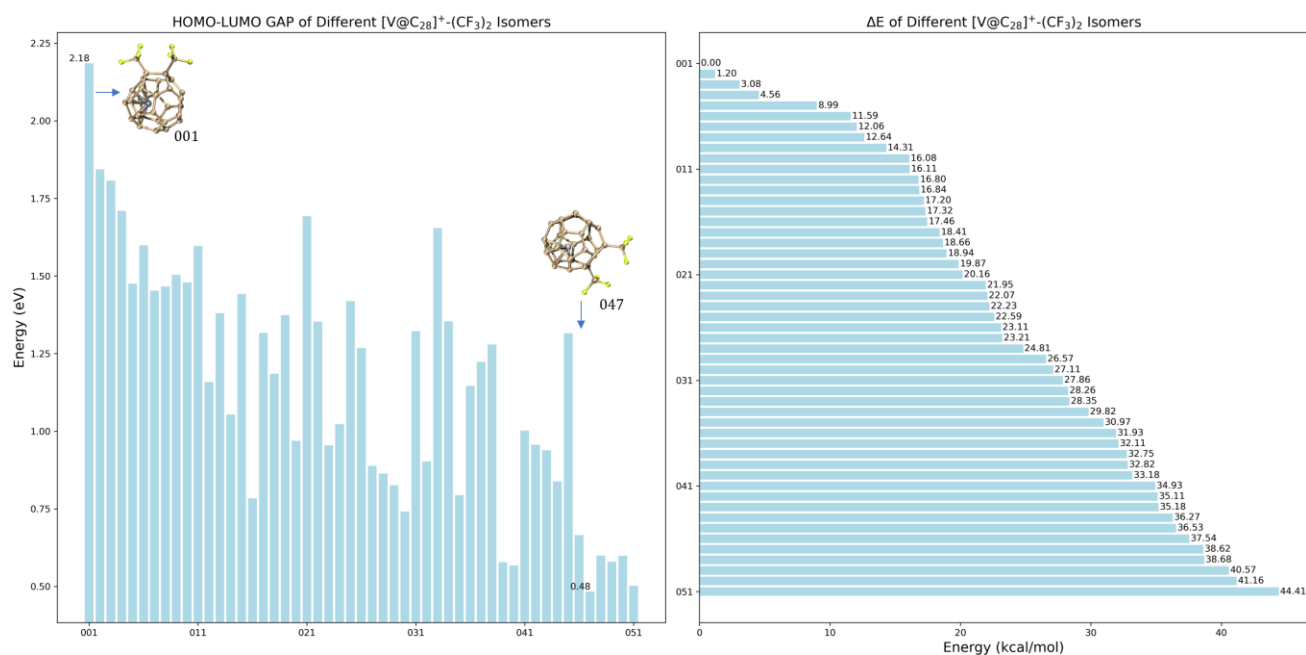

**Figure S2.** After the addition of two CF<sub>3</sub> groups, the HOMO-LUMO GAP and the energy relationships among different isomers, at the PBE-D3(BJ)/def2-SVP level.



## IV. EDA analysis

**Table S2.** The EDA results (in kcal/mol) of the  $[\text{TM}@\text{C}_{28}]$  with  $\text{TM}^{\text{m}+}$  and  $\text{C}_{28}^{\text{n}-}$  as interacting fragments at the BP86-D3(BJ)/TZ2P+ level.

| $[\text{Sc}@\text{C}_{28}]^-$         | Sc 4s <sup>2</sup> 3d <sup>1</sup><br>+[C <sub>28</sub> ] <sup>-</sup> | Sc <sup>+</sup> 4s <sup>0</sup> 3d <sup>2</sup><br>+[C <sub>28</sub> ] <sup>2-</sup> | Sc <sup>+</sup> 4s <sup>1</sup> 3d <sup>1</sup><br>+ [C <sub>28</sub> ] <sup>2-</sup> | Sc <sup>2+</sup> 4s <sup>0</sup> 3d <sup>1</sup><br>+ [C <sub>28</sub> ] <sup>3-</sup> | Sc <sup>2+</sup> 4s <sup>1</sup> 3d <sup>0</sup><br>+ [C <sub>28</sub> ] <sup>3-</sup> | Sc <sup>3+</sup> 4s <sup>0</sup> 3d <sup>0</sup><br>+ [C <sub>28</sub> ] <sup>4-</sup> |
|---------------------------------------|------------------------------------------------------------------------|--------------------------------------------------------------------------------------|---------------------------------------------------------------------------------------|----------------------------------------------------------------------------------------|----------------------------------------------------------------------------------------|----------------------------------------------------------------------------------------|
| $\Delta E_{\text{int}}$               | -274.95                                                                | -552.31                                                                              | -513.62                                                                               | -994.28                                                                                | -1074.63                                                                               | -1843.12                                                                               |
| $\Delta E_{\text{Pauli}}$             | 1345.90                                                                | 472.26                                                                               | 783.90                                                                                | 284.84                                                                                 | 624.06                                                                                 | 248.45                                                                                 |
| $\Delta E_{\text{disp}}^{\text{a}}$   | -2.79                                                                  | -2.79                                                                                | -2.79                                                                                 | -2.79                                                                                  | -2.79                                                                                  | -2.79                                                                                  |
| $\Delta E_{\text{elstat}}^{\text{a}}$ | -715.99                                                                | -363.65                                                                              | -509.97                                                                               | -533.37                                                                                | -699.82                                                                                | -983.46                                                                                |
| $\Delta E_{\text{orb}}$               | -902.08                                                                | -658.14                                                                              | -784.77                                                                               | -742.96                                                                                | -996.11                                                                                | -1105.33                                                                               |

  

| $[\text{Ti}@\text{C}_{28}]$           | Ti 4s <sup>2</sup> 3d <sup>2</sup><br>+[C <sub>28</sub> ] | Ti <sup>+</sup> 4s <sup>2</sup> 3d <sup>1</sup><br>+[C <sub>28</sub> ] <sup>-</sup> | Ti <sup>+</sup> 4s <sup>1</sup> 3d <sup>2</sup><br>+ [C <sub>28</sub> ] <sup>-</sup> | Ti <sup>2+</sup> 4s <sup>1</sup> 3d <sup>1</sup><br>+ [C <sub>28</sub> ] <sup>2-</sup> | Ti <sup>2+</sup> 4s <sup>2</sup> 3d <sup>0</sup><br>+ [C <sub>28</sub> ] <sup>2-</sup> | Ti <sup>3+</sup> 4s <sup>1</sup> 3d <sup>0</sup><br>+ [C <sub>28</sub> ] <sup>3-</sup> | Ti <sup>4+</sup> 4s <sup>0</sup> 3d <sup>0</sup><br>+ [C <sub>28</sub> ] <sup>4-</sup> |
|---------------------------------------|-----------------------------------------------------------|-------------------------------------------------------------------------------------|--------------------------------------------------------------------------------------|----------------------------------------------------------------------------------------|----------------------------------------------------------------------------------------|----------------------------------------------------------------------------------------|----------------------------------------------------------------------------------------|
| $\Delta E_{\text{int}}$               | -1873.80                                                  | -461.08                                                                             | -422.99                                                                              | -895.60                                                                                | -1091.93                                                                               | -1586.78                                                                               | -2543.15                                                                               |
| $\Delta E_{\text{Pauli}}$             | 1502.98                                                   | 1205.46                                                                             | 908.53                                                                               | 723.86                                                                                 | 1012.79                                                                                | 615.20                                                                                 | 313.90                                                                                 |
| $\Delta E_{\text{disp}}^{\text{a}}$   | -5.69                                                     | -5.69                                                                               | -5.69                                                                                | -5.69                                                                                  | -5.69                                                                                  | -5.69                                                                                  | -5.69                                                                                  |
| $\Delta E_{\text{elstat}}^{\text{a}}$ | -747.18                                                   | -594.45                                                                             | -464.52                                                                              | -547.78                                                                                | -668.21                                                                                | -908.21                                                                                | -1354.69                                                                               |
| $\Delta E_{\text{orb}}$               | -2623.88                                                  | -1066.32                                                                            | -861.29                                                                              | -1065.92                                                                               | -1430.67                                                                               | -1287.96                                                                               | -1496.59                                                                               |

  

| $[\text{V}@\text{C}_{28}]^+$          | V <sup>+</sup> 4s <sup>1</sup> 3d <sup>3</sup><br>+[C <sub>28</sub> ] | V <sup>+</sup> 4s <sup>2</sup> 3d <sup>2</sup><br>+[C <sub>28</sub> ] | V <sup>2+</sup> 4s <sup>0</sup> 3d <sup>3</sup><br>+ [C <sub>28</sub> ] <sup>-</sup> | V <sup>2+</sup> 4s <sup>1</sup> 3d <sup>2</sup><br>+ [C <sub>28</sub> ] <sup>-</sup> | V <sup>3+</sup> 4s <sup>0</sup> 3d <sup>2</sup><br>+ [C <sub>28</sub> ] <sup>2-</sup> | V <sup>4+</sup> 4s <sup>0</sup> 3d <sup>1</sup><br>+ [C <sub>28</sub> ] <sup>3-</sup> | Ti <sup>4+</sup> 4s <sup>1</sup> 3d <sup>0</sup><br>+ [C <sub>28</sub> ] <sup>3-</sup> |
|---------------------------------------|-----------------------------------------------------------------------|-----------------------------------------------------------------------|--------------------------------------------------------------------------------------|--------------------------------------------------------------------------------------|---------------------------------------------------------------------------------------|---------------------------------------------------------------------------------------|----------------------------------------------------------------------------------------|
| $\Delta E_{\text{int}}$               | -768.30                                                               | -833.54                                                               | -851.46                                                                              | -1007.04                                                                             | -1366.04                                                                              | -2997.75                                                                              | -2569.33                                                                               |
| $\Delta E_{\text{Pauli}}$             | 1145.45                                                               | 1071.78                                                               | 831.14                                                                               | 756.73                                                                               | 404.47                                                                                | 638.23                                                                                | 378.76                                                                                 |
| $\Delta E_{\text{disp}}^{\text{a}}$   | -5.36                                                                 | -5.36                                                                 | -5.36                                                                                | -5.36                                                                                | -5.36                                                                                 | -5.36                                                                                 | -5.36                                                                                  |
| $\Delta E_{\text{elstat}}^{\text{a}}$ | -513.34                                                               | -427.78                                                               | -463.13                                                                              | -397.26                                                                              | -495.70                                                                               | -1052.89                                                                              | -957.98                                                                                |
| $\Delta E_{\text{orb}}$               | -1394.99                                                              | -1472.17                                                              | -1214.05                                                                             | -1361.14                                                                             | -1269.46                                                                              | -2577.63                                                                              | -1984.72                                                                               |



## V. Cartesian coordinates of optimized structures

PBE-D3(BJ)/def2-TZVPPD

Singlet

[Sc@C<sub>28</sub>]<sup>−</sup>

29

symmetry C<sub>2v</sub>

|    |              |              |              |
|----|--------------|--------------|--------------|
| C  | −1.178620000 | 2.127919000  | −0.063358000 |
| C  | −2.016975000 | −0.297859000 | 1.313513000  |
| C  | −1.192432000 | 0.688451000  | 2.004264000  |
| C  | −0.750534000 | 1.895681000  | 1.313513000  |
| C  | 0.000000000  | 2.396107000  | −0.875955000 |
| C  | 0.750534000  | 1.895681000  | 1.313513000  |
| C  | 1.178620000  | 2.127919000  | −0.063358000 |
| C  | 0.000000000  | 0.000000000  | 2.516373000  |
| C  | 0.000000000  | 1.440024000  | −1.985520000 |
| C  | −1.256854000 | 0.725645000  | −1.979039000 |
| C  | −1.247097000 | −0.720012000 | −1.985520000 |
| C  | 1.256854000  | 0.725645000  | −1.979039000 |
| C  | 1.247097000  | −0.720012000 | −1.985520000 |
| C  | 0.000000000  | −1.451290000 | −1.979039000 |
| C  | 2.005774000  | 1.158034000  | −0.755831000 |
| C  | −1.253522000 | −2.084674000 | −0.063358000 |
| C  | −2.075089000 | −1.198053000 | −0.875955000 |
| C  | −1.266441000 | −1.597822000 | 1.313513000  |
| C  | 0.000000000  | −2.316069000 | −0.755831000 |
| C  | −2.432142000 | −0.043245000 | −0.063358000 |
| C  | −2.005774000 | 1.158034000  | −0.755831000 |
| C  | 1.253522000  | −2.084674000 | −0.063358000 |
| C  | 2.075089000  | −1.198053000 | −0.875955000 |
| C  | 1.192432000  | 0.688451000  | 2.004264000  |
| C  | 2.016975000  | −0.297859000 | 1.313513000  |
| C  | 2.432142000  | −0.043245000 | −0.063358000 |
| C  | 1.266441000  | −1.597822000 | 1.313513000  |
| C  | 0.000000000  | −1.376902000 | 2.004264000  |
| Sc | 0.000000000  | 0.000000000  | 0.216841000  |

[Y@C<sub>28</sub>]<sup>−</sup>

29

symmetry T<sub>d</sub>

|   |              |              |              |
|---|--------------|--------------|--------------|
| C | −0.050963000 | 1.733201000  | −1.733201000 |
| C | 2.336744000  | 0.534178000  | −0.534178000 |
| C | 1.733201000  | −0.050963000 | −1.733201000 |
| C | 0.534178000  | 0.534178000  | −2.336744000 |

|   |              |              |              |
|---|--------------|--------------|--------------|
| C | −1.470004000 | 1.470004000  | −1.470004000 |
| C | −0.534178000 | −0.534178000 | −2.336744000 |
| C | −1.733201000 | 0.050963000  | −1.733201000 |
| C | 1.470004000  | −1.470004000 | −1.470004000 |
| C | −1.733201000 | 1.733201000  | −0.050963000 |
| C | −0.534178000 | 2.336744000  | 0.534178000  |
| C | 0.050963000  | 1.733201000  | 1.733201000  |
| C | −2.336744000 | 0.534178000  | 0.534178000  |
| C | −1.733201000 | −0.050963000 | 1.733201000  |
| C | −0.534178000 | 0.534178000  | 2.336744000  |
| C | −2.336744000 | −0.534178000 | −0.534178000 |
| C | 1.733201000  | 0.050963000  | 1.733201000  |
| C | 1.470004000  | 1.470004000  | 1.470004000  |
| C | 2.336744000  | −0.534178000 | 0.534178000  |
| C | 0.534178000  | −0.534178000 | 2.336744000  |
| C | 1.733201000  | 1.733201000  | 0.050963000  |
| C | 0.534178000  | 2.336744000  | −0.534178000 |
| C | −0.050963000 | −1.733201000 | 1.733201000  |
| C | −1.470004000 | −1.470004000 | 1.470004000  |
| C | 0.050963000  | −1.733201000 | −1.733201000 |
| C | −0.534178000 | −2.336744000 | −0.534178000 |
| C | −1.733201000 | −1.733201000 | 0.050963000  |
| C | 0.534178000  | −2.336744000 | 0.534178000  |
| C | 1.733201000  | −1.733201000 | −0.050963000 |
| Y | 0.000000000  | 0.000000000  | 0.000000000  |

[La@C<sub>28</sub>]<sup>−</sup>

29

symmetry T<sub>d</sub>

|   |              |              |              |
|---|--------------|--------------|--------------|
| C | 0.052141000  | 1.754154000  | 1.754154000  |
| C | −2.368086000 | 0.540369000  | 0.540369000  |
| C | −1.754154000 | −0.052141000 | 1.754154000  |
| C | −0.540369000 | 0.540369000  | 2.368086000  |
| C | 1.477880000  | 1.477880000  | 1.477880000  |
| C | 0.540369000  | −0.540369000 | 2.368086000  |
| C | 1.754154000  | 0.052141000  | 1.754154000  |
| C | −1.477880000 | −1.477880000 | 1.477880000  |
| C | 1.754154000  | 1.754154000  | 0.052141000  |
| C | 0.540369000  | 2.368086000  | −0.540369000 |
| C | −0.052141000 | 1.754154000  | −1.754154000 |
| C | 2.368086000  | 0.540369000  | −0.540369000 |
| C | 1.754154000  | −0.052141000 | −1.754154000 |

|                          |              |              |              |
|--------------------------|--------------|--------------|--------------|
| C                        | 0.540369000  | 0.540369000  | -2.368086000 |
| C                        | 2.368086000  | -0.540369000 | 0.540369000  |
| C                        | -1.754154000 | 0.052141000  | -1.754154000 |
| C                        | -1.477880000 | 1.477880000  | -1.477880000 |
| C                        | -2.368086000 | -0.540369000 | -0.540369000 |
| C                        | -0.540369000 | -0.540369000 | -2.368086000 |
| C                        | -1.754154000 | 1.754154000  | -0.052141000 |
| C                        | -0.540369000 | 2.368086000  | 0.540369000  |
| C                        | 0.052141000  | -1.754154000 | -1.754154000 |
| C                        | 1.477880000  | -1.477880000 | -1.477880000 |
| C                        | -0.052141000 | -1.754154000 | 1.754154000  |
| C                        | 0.540369000  | -2.368086000 | 0.540369000  |
| C                        | 1.754154000  | -1.754154000 | -0.052141000 |
| C                        | -0.540369000 | -2.368086000 | -0.540369000 |
| C                        | -1.754154000 | -1.754154000 | 0.052141000  |
| La                       | 0.000000000  | 0.000000000  | 0.000000000  |
| [Ti@C <sub>28</sub> ]    |              |              |              |
| 29                       |              |              |              |
| symmetry C <sub>3v</sub> |              |              |              |
| C                        | 0.000000000  | 1.438208000  | -2.031167000 |
| C                        | 0.000000000  | -1.447157000 | -2.021421000 |
| C                        | -1.245524000 | -0.719104000 | -2.031167000 |
| C                        | -1.253275000 | 0.723579000  | -2.021421000 |
| C                        | 0.000000000  | 2.377145000  | -0.907087000 |
| C                        | -1.991596000 | 1.149848000  | -0.800244000 |
| C                        | -1.173967000 | 2.115308000  | -0.103086000 |
| C                        | -2.058668000 | -1.188573000 | -0.907087000 |
| C                        | 1.173967000  | 2.115308000  | -0.103086000 |
| C                        | 1.991596000  | 1.149848000  | -0.800244000 |
| C                        | 2.418894000  | -0.040969000 | -0.103086000 |
| C                        | 0.748504000  | 1.877518000  | 1.274582000  |
| C                        | 1.207311000  | 0.697042000  | 2.007470000  |
| C                        | 2.000230000  | -0.290535000 | 1.274582000  |
| C                        | -0.748504000 | 1.877518000  | 1.274582000  |
| C                        | 1.244927000  | -2.074339000 | -0.103086000 |
| C                        | 2.058668000  | -1.188573000 | -0.907087000 |
| C                        | 0.000000000  | -2.299697000 | -0.800244000 |
| C                        | 1.251726000  | -1.586983000 | 1.274582000  |
| C                        | 1.245524000  | -0.719104000 | -2.031167000 |
| C                        | 1.253275000  | 0.723579000  | -2.021421000 |
| C                        | 0.000000000  | -1.394083000 | 2.007470000  |
| C                        | 0.000000000  | 0.000000000  | 2.520804000  |
| C                        | -2.418894000 | -0.040969000 | -0.103086000 |
| C                        | -2.000230000 | -0.290535000 | 1.274582000  |

|                          |              |              |              |
|--------------------------|--------------|--------------|--------------|
| C                        | -1.207311000 | 0.697042000  | 2.007470000  |
| C                        | -1.251726000 | -1.586983000 | 1.274582000  |
| C                        | -1.244927000 | -2.074339000 | -0.103086000 |
| Ti                       | 0.000000000  | 0.000000000  | 0.465699000  |
| [Zr@C <sub>28</sub> ]    |              |              |              |
| 29                       |              |              |              |
| symmetry C <sub>2v</sub> |              |              |              |
| C                        | 0.000000000  | 2.440740000  | -0.069731000 |
| C                        | 0.000000000  | 0.751661000  | 2.315902000  |
| C                        | 1.258670000  | 1.185905000  | 1.713254000  |
| C                        | 1.267648000  | 2.018750000  | 0.516471000  |
| C                        | 0.000000000  | 2.078128000  | -1.482645000 |
| C                        | 2.016102000  | 1.265705000  | -0.545624000 |
| C                        | 1.179906000  | 1.254071000  | -1.737122000 |
| C                        | 2.072917000  | 0.000000000  | 1.452970000  |
| C                        | -1.179906000 | 1.254071000  | -1.737122000 |
| C                        | -2.016102000 | 1.265705000  | -0.545624000 |
| C                        | -2.436998000 | 0.000000000  | 0.034641000  |
| C                        | -0.750719000 | 0.000000000  | -2.332528000 |
| C                        | -1.179906000 | -1.254071000 | -1.737122000 |
| C                        | -2.016102000 | -1.265705000 | -0.545624000 |
| C                        | 0.750719000  | 0.000000000  | -2.332528000 |
| C                        | -1.258670000 | -1.185905000 | 1.713254000  |
| C                        | -2.072917000 | 0.000000000  | 1.452970000  |
| C                        | 0.000000000  | -0.751661000 | 2.315902000  |
| C                        | -1.267648000 | -2.018750000 | 0.516471000  |
| C                        | -1.258670000 | 1.185905000  | 1.713254000  |
| C                        | -1.267648000 | 2.018750000  | 0.516471000  |
| C                        | 0.000000000  | -2.440740000 | -0.069731000 |
| C                        | 0.000000000  | -2.078128000 | -1.482645000 |
| C                        | 2.436998000  | 0.000000000  | 0.034641000  |
| C                        | 2.016102000  | -1.265705000 | -0.545624000 |
| C                        | 1.179906000  | -1.254071000 | -1.737122000 |
| C                        | 1.267648000  | -2.018750000 | 0.516471000  |
| C                        | 1.258670000  | -1.185905000 | 1.713254000  |
| Zr                       | 0.000000000  | 0.000000000  | 0.056229000  |
| [Hf@C <sub>28</sub> ]    |              |              |              |
| 29                       |              |              |              |
| symmetry T <sub>d</sub>  |              |              |              |
| C                        | 0.052547000  | 1.725710000  | 1.725710000  |
| C                        | -2.322286000 | 0.530640000  | 0.530640000  |
| C                        | -1.725710000 | -0.052547000 | 1.725710000  |
| C                        | -0.530640000 | 0.530640000  | 2.322286000  |
| C                        | 1.468633000  | 1.468633000  | 1.468633000  |

|                                   |              |              |              |
|-----------------------------------|--------------|--------------|--------------|
| C                                 | 0.530640000  | -0.530640000 | 2.322286000  |
| C                                 | 1.725710000  | 0.052547000  | 1.725710000  |
| C                                 | -1.468633000 | -1.468633000 | 1.468633000  |
| C                                 | 1.725710000  | 1.725710000  | 0.052547000  |
| C                                 | 0.530640000  | 2.322286000  | -0.530640000 |
| C                                 | -0.052547000 | 1.725710000  | -1.725710000 |
| C                                 | 2.322286000  | 0.530640000  | -0.530640000 |
| C                                 | 1.725710000  | -0.052547000 | -1.725710000 |
| C                                 | 0.530640000  | 0.530640000  | -2.322286000 |
| C                                 | 2.322286000  | -0.530640000 | 0.530640000  |
| C                                 | -1.725710000 | 0.052547000  | -1.725710000 |
| C                                 | -1.468633000 | 1.468633000  | -1.468633000 |
| C                                 | -2.322286000 | -0.530640000 | -0.530640000 |
| C                                 | -0.530640000 | -0.530640000 | -2.322286000 |
| C                                 | -1.725710000 | 1.725710000  | -0.052547000 |
| C                                 | -0.530640000 | 2.322286000  | 0.530640000  |
| C                                 | 0.052547000  | -1.725710000 | -1.725710000 |
| C                                 | 1.468633000  | -1.468633000 | -1.468633000 |
| C                                 | -0.052547000 | -1.725710000 | 1.725710000  |
| C                                 | 0.530640000  | -2.322286000 | 0.530640000  |
| C                                 | 1.725710000  | -1.725710000 | -0.052547000 |
| C                                 | -0.530640000 | -2.322286000 | -0.530640000 |
| C                                 | -1.725710000 | -1.725710000 | 0.052547000  |
| Hf                                | 0.000000000  | 0.000000000  | 0.000000000  |
| [V@C <sub>28</sub> ] <sup>+</sup> |              |              |              |
| 29                                |              |              |              |
| symmetry C <sub>3v</sub>          |              |              |              |
| C                                 | 1.174706000  | 2.108405000  | -0.121545000 |
| C                                 | 1.991061000  | -0.284050000 | 1.248310000  |
| C                                 | 2.413286000  | -0.036877000 | -0.121545000 |
| C                                 | 1.996670000  | 1.152778000  | -0.826469000 |
| C                                 | 0.000000000  | 2.367138000  | -0.922406000 |
| C                                 | 1.254512000  | 0.724293000  | -2.031961000 |
| C                                 | 0.000000000  | 1.440521000  | -2.045654000 |
| C                                 | 2.050001000  | -1.183569000 | -0.922406000 |
| C                                 | -1.174706000 | 2.108405000  | -0.121545000 |
| C                                 | -0.749536000 | 1.866335000  | 1.248310000  |
| C                                 | -1.211076000 | 0.699215000  | 2.004377000  |
| C                                 | -1.996670000 | 1.152778000  | -0.826469000 |
| C                                 | -2.413286000 | -0.036877000 | -0.121545000 |
| C                                 | -1.991061000 | -0.284050000 | 1.248310000  |
| C                                 | -1.254512000 | 0.724293000  | -2.031961000 |
| C                                 | 0.000000000  | -1.398430000 | 2.004377000  |
| C                                 | 0.000000000  | 0.000000000  | 2.530408000  |

|                                    |              |              |              |
|------------------------------------|--------------|--------------|--------------|
| C                                  | 1.241525000  | -1.582284000 | 1.248310000  |
| C                                  | -1.241525000 | -1.582284000 | 1.248310000  |
| C                                  | 1.211076000  | 0.699215000  | 2.004377000  |
| C                                  | 0.749536000  | 1.866335000  | 1.248310000  |
| C                                  | -1.238579000 | -2.071528000 | -0.121545000 |
| C                                  | -2.050001000 | -1.183569000 | -0.922406000 |
| C                                  | 1.247528000  | -0.720260000 | -2.045654000 |
| C                                  | 0.000000000  | -1.448586000 | -2.031961000 |
| C                                  | -1.247528000 | -0.720260000 | -2.045654000 |
| C                                  | 0.000000000  | -2.305556000 | -0.826469000 |
| C                                  | 1.238579000  | -2.071528000 | -0.121545000 |
| V                                  | 0.000000000  | 0.000000000  | 0.567481000  |
| [Nb@C <sub>28</sub> ] <sup>+</sup> |              |              |              |
| 29                                 |              |              |              |
| symmetry C <sub>2v</sub>           |              |              |              |
| C                                  | 0.000000000  | 2.471755000  | -0.183196000 |
| C                                  | 0.000000000  | 0.768666000  | 2.313883000  |
| C                                  | 1.264600000  | 1.213547000  | 1.664881000  |
| C                                  | 1.249234000  | 2.002799000  | 0.429609000  |
| C                                  | 0.000000000  | 2.080373000  | -1.561391000 |
| C                                  | 1.984063000  | 1.249175000  | -0.620459000 |
| C                                  | 1.173456000  | 1.244296000  | -1.821153000 |
| C                                  | 2.039919000  | 0.000000000  | 1.370435000  |
| C                                  | -1.173456000 | 1.244296000  | -1.821153000 |
| C                                  | -1.984063000 | 1.249175000  | -0.620459000 |
| C                                  | -2.415370000 | 0.000000000  | -0.045854000 |
| C                                  | -0.754108000 | 0.000000000  | -2.408036000 |
| C                                  | -1.173456000 | -1.244296000 | -1.821153000 |
| C                                  | -1.984063000 | -1.249175000 | -0.620459000 |
| C                                  | 0.754108000  | 0.000000000  | -2.408036000 |
| C                                  | -1.264600000 | -1.213547000 | 1.664881000  |
| C                                  | -2.039919000 | 0.000000000  | 1.370435000  |
| C                                  | 0.000000000  | -0.768666000 | 2.313883000  |
| C                                  | -1.249234000 | -2.002799000 | 0.429609000  |
| C                                  | -1.264600000 | 1.213547000  | 1.664881000  |
| C                                  | -1.249234000 | 2.002799000  | 0.429609000  |
| C                                  | 0.000000000  | -2.471755000 | -0.183196000 |
| C                                  | 0.000000000  | -2.080373000 | -1.561391000 |
| C                                  | 2.415370000  | 0.000000000  | -0.045854000 |
| C                                  | 1.984063000  | -1.249175000 | -0.620459000 |
| C                                  | 1.173456000  | -1.244296000 | -1.821153000 |
| C                                  | 1.249234000  | -2.002799000 | 0.429609000  |
| C                                  | 1.264600000  | -1.213547000 | 1.664881000  |
| Nb                                 | 0.000000000  | 0.000000000  | 0.353679000  |

[Ta@C<sub>28</sub>]<sup>+</sup>

29

symmetry C<sub>3v</sub>

|    |              |              |              |
|----|--------------|--------------|--------------|
| C  | -1.178949000 | 2.128886000  | -0.164796000 |
| C  | -2.017964000 | -0.295975000 | 1.222279000  |
| C  | -1.211044000 | 0.699196000  | 1.943244000  |
| C  | -0.752660000 | 1.895596000  | 1.222279000  |
| C  | 0.000000000  | 2.383466000  | -0.966293000 |
| C  | 0.752660000  | 1.895596000  | 1.222279000  |
| C  | 1.178949000  | 2.128886000  | -0.164796000 |
| C  | 0.000000000  | 0.000000000  | 2.448880000  |
| C  | 0.000000000  | 1.437161000  | -2.087952000 |
| C  | -1.253792000 | 0.723877000  | -2.078939000 |
| C  | -1.244618000 | -0.718580000 | -2.087952000 |
| C  | 1.253792000  | 0.723877000  | -2.078939000 |
| C  | 1.244618000  | -0.718580000 | -2.087952000 |
| C  | 0.000000000  | -1.447754000 | -2.078939000 |
| C  | 1.999795000  | 1.154582000  | -0.859589000 |
| C  | -1.254195000 | -2.085443000 | -0.164796000 |
| C  | -2.064142000 | -1.191733000 | -0.966293000 |
| C  | -1.265304000 | -1.599621000 | 1.222279000  |
| C  | 0.000000000  | -2.309165000 | -0.859589000 |
| C  | -2.433144000 | -0.043443000 | -0.164796000 |
| C  | -1.999795000 | 1.154582000  | -0.859589000 |
| C  | 1.254195000  | -2.085443000 | -0.164796000 |
| C  | 2.064142000  | -1.191733000 | -0.966293000 |
| C  | 1.211044000  | 0.699196000  | 1.943244000  |
| C  | 2.017964000  | -0.295975000 | 1.222279000  |
| C  | 2.433144000  | -0.043443000 | -0.164796000 |
| C  | 1.265304000  | -1.599621000 | 1.222279000  |
| C  | 0.000000000  | -1.398393000 | 1.943244000  |
| Ta | 0.000000000  | 0.000000000  | 0.275738000  |

PBE-D3(BJ)/def2-SVP

Doublet

[V@C28]<sup>-</sup> - CF<sub>3</sub>

33

Isomer: 1

|   |             |             |             |
|---|-------------|-------------|-------------|
| C | 1.19334400  | 2.06587600  | -0.05544400 |
| C | 2.02252800  | -0.31946800 | 1.23100000  |
| C | 2.47783600  | -0.05857500 | -0.13539600 |
| C | 2.01682200  | 1.14070100  | -0.80620000 |
| C | -0.00827300 | 2.30022200  | -0.83121600 |
| C | 1.26451500  | 0.74050700  | -2.02825000 |
| C | -0.00826600 | 1.43742600  | -2.01150700 |
| C | 2.09016500  | -1.18471000 | -0.94949800 |
| C | -1.16626800 | 2.07145200  | -0.02730500 |
| C | -0.73674900 | 1.83218600  | 1.34142900  |
| C | -1.18482100 | 0.64811200  | 2.10883800  |
| C | -2.19349900 | 1.26779200  | -0.83257700 |
| C | -2.37692800 | -0.04174600 | -0.05740200 |
| C | -1.97001900 | -0.32050000 | 1.31076500  |
| C | -1.26196500 | 0.75123400  | -2.03729700 |
| C | 0.05640200  | -1.44408200 | 1.99431700  |
| C | 0.05237000  | -0.06717400 | 2.56512100  |
| C | 1.28292500  | -1.61043800 | 1.21265000  |
| C | -1.20496000 | -1.62257900 | 1.26908600  |
| C | 1.24908200  | 0.63764900  | 2.02396800  |
| C | 0.77387500  | 1.83140600  | 1.31824400  |
| C | -1.17824600 | -2.07363500 | -0.11429500 |
| C | -1.97868500 | -1.13903900 | -0.88011400 |
| C | 1.27395100  | -0.70106400 | -2.07747100 |
| C | 0.02516000  | -1.42272600 | -2.05900300 |
| C | -1.21999600 | -0.67759600 | -2.04158000 |
| C | 0.04552900  | -2.30009300 | -0.85508800 |
| C | 1.30491400  | -2.10580400 | -0.16448200 |
| V | -0.07512400 | 0.03382600  | 0.60973400  |
| C | -3.48118700 | 2.01100900  | -1.23432400 |
| F | -3.17519300 | 3.10660400  | -1.94548200 |
| F | -4.26283900 | 1.20796600  | -1.97160100 |
| F | -4.14980900 | 2.37880700  | -0.12561400 |

[V@C28]<sup>-</sup> - CF<sub>3</sub>

33

Isomer: 2

|   |            |             |             |
|---|------------|-------------|-------------|
| C | 1.17797900 | 2.05844300  | -0.11743300 |
| C | 1.98429100 | -0.30773400 | 1.22323500  |
| C | 2.43811100 | -0.09627400 | -0.15474600 |

|   |             |             |             |
|---|-------------|-------------|-------------|
| C | 1.95637700  | 1.09280700  | -0.83371200 |
| C | -0.00068300 | 2.51038900  | -0.98951500 |
| C | 1.20937900  | 0.67607800  | -2.05364400 |
| C | -0.01846500 | 1.40607900  | -2.08361600 |
| C | 2.04150000  | -1.23250900 | -0.94361900 |
| C | -1.16176500 | 2.06825800  | -0.08925800 |
| C | -0.73104600 | 1.89596900  | 1.29622800  |
| C | -1.19115700 | 0.70034500  | 2.04350900  |
| C | -1.96515600 | 1.10917000  | -0.78648100 |
| C | -2.44040300 | -0.07588800 | -0.09601400 |
| C | -1.95538400 | -0.29127300 | 1.27070200  |
| C | -1.25129800 | 0.68635500  | -2.02401200 |
| C | 0.01873000  | -1.40056800 | 1.98360000  |
| C | 0.03106600  | -0.00740000 | 2.52489500  |
| C | 1.24282800  | -1.60408200 | 1.23158100  |
| C | -1.22479400 | -1.59377300 | 1.26130300  |
| C | 1.24720900  | 0.69012600  | 2.01410400  |
| C | 0.77928800  | 1.88963000  | 1.27801800  |
| C | -1.25691600 | -2.12040300 | -0.09569500 |
| C | -2.07245300 | -1.21532500 | -0.89410900 |
| C | 1.21575600  | -0.77349400 | -2.06788200 |
| C | -0.03009500 | -1.49856600 | -2.03892500 |
| C | -1.27016800 | -0.76310600 | -2.03795800 |
| C | -0.01877800 | -2.34284100 | -0.80499700 |
| C | 1.23789500  | -2.13084000 | -0.12572500 |
| V | 0.00794100  | 0.15749500  | 0.55541900  |
| C | -0.00012300 | 3.97871500  | -1.45130100 |
| F | 0.01615000  | 4.78673700  | -0.37389400 |
| F | 1.08636700  | 4.22311000  | -2.19854000 |
| F | -1.10218400 | 4.23217200  | -2.17227400 |

[V@C28]<sup>-</sup> - CF<sub>3</sub>

33

Isomer: 3

|   |             |             |             |
|---|-------------|-------------|-------------|
| C | 1.15574000  | 2.28391700  | -0.14972800 |
| C | 2.10184800  | -0.19891400 | 1.36812300  |
| C | 2.47686600  | 0.08222500  | -0.03090800 |
| C | 1.98017400  | 1.24341900  | -0.76003800 |
| C | -0.02340000 | 2.44713700  | -0.96884500 |
| C | 1.25334100  | 0.76687800  | -1.96152800 |
| C | -0.00288600 | 1.47077800  | -2.06016200 |
| C | 2.07701100  | -1.10213600 | -0.80639500 |
| C | -1.21869800 | 2.16160200  | -0.17234200 |
| C | -0.76755300 | 1.91514900  | 1.17636000  |
| C | -1.17255800 | 0.72605200  | 1.87590900  |

|   |             |             |             |
|---|-------------|-------------|-------------|
| C | -2.00963400 | 1.15089900  | -0.84500400 |
| C | -2.41953100 | -0.05818200 | -0.16181400 |
| C | -1.91805000 | -0.28950700 | 1.16707900  |
| C | -1.23723600 | 0.71204400  | -2.04434600 |
| C | 0.04674700  | -1.34197000 | 2.01007400  |
| C | 0.00687500  | 0.07411000  | 2.40796700  |
| C | 1.39101600  | -1.57006500 | 1.41210300  |
| C | -1.18005300 | -1.54835600 | 1.23697000  |
| C | 1.19797700  | 0.80891200  | 1.95488800  |
| C | 0.71430300  | 1.96273900  | 1.20558300  |
| C | -1.34863100 | -2.32501000 | -0.07603900 |
| C | -2.08196400 | -1.23731300 | -0.94632400 |
| C | 1.28529000  | -0.67045700 | -1.94041500 |
| C | 0.04035900  | -1.40215600 | -1.87376500 |
| C | -1.22735000 | -0.73556000 | -2.01298600 |
| C | 0.05799400  | -2.25163200 | -0.68539500 |
| C | 1.33353500  | -2.07304200 | 0.01200500  |
| V | 0.42375000  | -0.28691400 | 0.31977700  |
| C | -1.99702400 | -3.71830400 | 0.01613000  |
| F | -3.22080000 | -3.62045500 | 0.55426100  |
| F | -2.08786500 | -4.26408000 | -1.20479100 |
| F | -1.23532300 | -4.50941500 | 0.79620700  |

[V@C28]⁻ - CF₃

33

Isomer: 4

|   |             |             |             |
|---|-------------|-------------|-------------|
| C | 1.24167700  | 2.06150100  | -0.09637600 |
| C | 1.94881100  | -0.36046800 | 1.27577100  |
| C | 2.42185400  | -0.11659000 | -0.09149700 |
| C | 2.03095500  | 1.07394800  | -0.80000900 |
| C | 0.10134400  | 2.32528100  | -0.93125000 |
| C | 1.34270400  | 0.69164800  | -2.07275600 |
| C | 0.11106400  | 1.44471500  | -2.11092500 |
| C | 2.03956100  | -1.23403100 | -0.93078900 |
| C | -1.10033000 | 2.11266700  | -0.14868100 |
| C | -0.73058400 | 1.85282200  | 1.23668900  |
| C | -1.38068500 | 0.79150800  | 2.17059900  |
| C | -1.92001500 | 1.20597600  | -0.91090100 |
| C | -2.37954800 | 0.03784200  | -0.20424700 |
| C | -2.01387200 | -0.22893700 | 1.18077600  |
| C | -1.16495800 | 0.77337600  | -2.13667700 |
| C | -0.09206300 | -1.40470900 | 1.96273900  |
| C | -0.07529100 | -0.02204600 | 2.50488100  |
| C | 1.16612000  | -1.63010300 | 1.24170200  |
| C | -1.30923300 | -1.53228900 | 1.17236600  |

|   |             |             |             |
|---|-------------|-------------|-------------|
| C | 1.16497800  | 0.63415300  | 2.01777500  |
| C | 0.75033400  | 1.80900400  | 1.26210100  |
| C | -1.28187600 | -2.03231400 | -0.20581700 |
| C | -2.01044100 | -1.10024600 | -1.02282200 |
| C | 1.31197400  | -0.75387800 | -2.11844300 |
| C | 0.03391400  | -1.43153500 | -2.12946200 |
| C | -1.19133300 | -0.66816100 | -2.16728500 |
| C | -0.02838600 | -2.26683200 | -0.88919200 |
| C | 1.19347900  | -2.10902200 | -0.14467800 |
| V | 0.01987700  | -0.02562500 | 0.49411000  |
| C | -2.24418100 | 1.29203900  | 3.33947700  |
| F | -3.30654700 | 1.95921700  | 2.85816100  |
| F | -2.67005100 | 0.24782600  | 4.06935900  |
| F | -1.52161500 | 2.11254700  | 4.11976000  |

[V@C28]⁻ - CF₃

33

Isomer: 5

|   |             |             |             |
|---|-------------|-------------|-------------|
| C | 1.07500300  | 2.16102500  | -0.12499600 |
| C | 1.99031000  | -0.21813300 | 1.20223100  |
| C | 2.37868500  | 0.01910200  | -0.19113900 |
| C | 1.87341100  | 1.18136300  | -0.88244600 |
| C | -0.11878500 | 2.36321900  | -0.88624600 |
| C | 1.15934100  | 0.77563900  | -2.06736800 |
| C | -0.11355700 | 1.44418600  | -2.03194700 |
| C | 2.06398800  | -1.14030500 | -0.98241900 |
| C | -1.27501100 | 2.10177600  | -0.04826200 |
| C | -0.80269100 | 1.88021100  | 1.31871300  |
| C | -1.20719100 | 0.69486800  | 2.10000800  |
| C | -2.08520600 | 1.12435000  | -0.74019300 |
| C | -2.45685300 | -0.06754400 | -0.01093700 |
| C | -1.99481100 | -0.30798800 | 1.35635500  |
| C | -1.35586700 | 0.70558600  | -1.98515000 |
| C | 0.06073600  | -1.37539100 | 2.03406500  |
| C | 0.04262300  | 0.02209900  | 2.57224200  |
| C | 1.28098100  | -1.52017100 | 1.22465000  |
| C | -1.20505500 | -1.58731400 | 1.31968600  |
| C | 1.21859500  | 0.74991500  | 1.99749500  |
| C | 0.69977400  | 1.90908700  | 1.25952100  |
| C | -1.23316000 | -2.07574000 | -0.05211200 |
| C | -2.06145900 | -1.20269800 | -0.82491100 |
| C | 1.31248700  | -0.75342800 | -2.28857100 |
| C | -0.05171400 | -1.44739500 | -2.02913700 |
| C | -1.30319900 | -0.73946700 | -1.99440300 |
| C | 0.01182900  | -2.23566000 | -0.82365900 |

|   |             |             |             |
|---|-------------|-------------|-------------|
| C | 1.27218700  | -2.01191900 | -0.15618100 |
| V | -0.05215600 | 0.04016500  | 0.62187000  |
| C | 1.99521900  | -1.14780500 | -3.61687500 |
| F | 3.19877200  | -0.55908600 | -3.70780500 |
| F | 2.15368100  | -2.47989400 | -3.67518700 |
| F | 1.23281700  | -0.75040000 | -4.64924800 |

[V@C28] - CF<sub>3</sub>

33

Isomer: 6

|   |             |             |             |
|---|-------------|-------------|-------------|
| C | 1.14531200  | 2.11215600  | -0.14586700 |
| C | 1.97151900  | -0.25346900 | 1.23253400  |
| C | 2.40260300  | -0.00078100 | -0.14586100 |
| C | 1.96092400  | 1.16688900  | -0.86328600 |
| C | -0.03076500 | 2.33157800  | -0.95800600 |
| C | 1.24370600  | 0.74017000  | -2.11317300 |
| C | -0.01902500 | 1.43985800  | -2.12918500 |
| C | 2.03458800  | -1.13914600 | -0.95800600 |
| C | -1.20062500 | 2.08110600  | -0.14586100 |
| C | -0.76624900 | 1.83412000  | 1.23253400  |
| C | -1.20948600 | 0.67719600  | 2.01085700  |
| C | -1.99101800 | 1.11476600  | -0.86328600 |
| C | -2.40183700 | -0.06420900 | -0.14586700 |
| C | -1.96417500 | -0.30535700 | 1.23253100  |
| C | -1.26285900 | 0.70699600  | -2.11317300 |
| C | 0.01827400  | -1.38604400 | 2.01085700  |
| C | 0.00000000  | 0.00000000  | 2.76055100  |
| C | 1.24653400  | -1.54834700 | 1.23253100  |
| C | -1.20527000 | -1.58065100 | 1.23253400  |
| C | 1.19121200  | 0.70884800  | 2.01085700  |
| C | 0.71764100  | 1.85370400  | 1.23253100  |
| C | -1.20197800 | -2.08032500 | -0.14586100 |
| C | -2.00382300 | -1.19243200 | -0.95800600 |
| C | 1.25646600  | -0.70345300 | -2.12918500 |
| C | 0.01915300  | -1.44716600 | -2.11317300 |
| C | -1.23744100 | -0.73640500 | -2.12918500 |
| C | 0.03009300  | -2.28165500 | -0.86328600 |
| C | 1.25652500  | -2.04794700 | -0.14586700 |
| V | 0.00000000  | 0.00000000  | 0.49136500  |
| C | 0.00000000  | 0.00000000  | 4.29775400  |
| F | -0.01645100 | 1.26496700  | 4.74870500  |
| F | -1.08726800 | -0.64673000 | 4.74870500  |
| F | 1.10371900  | -0.61823700 | 4.74870500  |

[V@C28] - CF<sub>3</sub>

33

|           |             |             |             |
|-----------|-------------|-------------|-------------|
| Isomer: 7 |             |             |             |
| C         | 1.18010200  | 2.06149500  | -0.15161600 |
| C         | 1.99363700  | -0.30465400 | 1.22918600  |
| C         | 2.37426800  | -0.05005500 | -0.16570600 |
| C         | 2.03577500  | 1.15672700  | -0.87293900 |
| C         | -0.02037700 | 2.29343500  | -0.92640000 |
| C         | 1.31089900  | 0.75589300  | -2.23991500 |
| C         | -0.07372100 | 1.41948800  | -2.05091700 |
| C         | 1.94991900  | -1.19049000 | -0.94965700 |
| C         | -1.20083400 | 2.09244800  | -0.08172300 |
| C         | -0.72862400 | 1.86589500  | 1.27392800  |
| C         | -1.18894900 | 0.70340200  | 2.04664100  |
| C         | -2.04442500 | 1.14605600  | -0.76494300 |
| C         | -2.46509900 | -0.04625400 | -0.04668000 |
| C         | -1.99829400 | -0.27701000 | 1.31245100  |
| C         | -1.32182100 | 0.70781000  | -1.98696700 |
| C         | 0.00212800  | -1.40269500 | 2.03260400  |
| C         | 0.02769400  | -0.00181500 | 2.55395700  |
| C         | 1.23115900  | -1.59941300 | 1.25081500  |
| C         | -1.25934600 | -1.58362900 | 1.30372900  |
| C         | 1.23914000  | 0.68695500  | 2.00799100  |
| C         | 0.77374400  | 1.85235100  | 1.24357000  |
| C         | -1.30996300 | -2.08880400 | -0.06032300 |
| C         | -2.13743300 | -1.20353800 | -0.85096200 |
| C         | 1.16707700  | -0.77448400 | -2.06556700 |
| C         | -0.08565800 | -1.47798500 | -2.00156600 |
| C         | -1.33731600 | -0.74341600 | -1.99230200 |
| C         | -0.07550700 | -2.33540500 | -0.78820100 |
| C         | 1.17416300  | -2.10706700 | -0.10976100 |
| V         | 0.01605700  | 0.00465500  | 0.58949300  |
| C         | 2.06634300  | 1.19169800  | -3.51880900 |
| F         | 2.20532900  | 2.52674000  | -3.53386900 |
| F         | 3.28205000  | 0.62327700  | -3.54655700 |
| F         | 1.37571800  | 0.80831700  | -4.60380500 |



PBE-D3(BJ)/def2-SVP

Singlet

[V@C28]<sup>-</sup> - [CF<sub>3</sub>]<sub>2</sub>

37

Isomer: 1

|   |              |              |              |
|---|--------------|--------------|--------------|
| C | 1.709287553  | 2.159468603  | -1.178224617 |
| C | -0.231606712 | 0.170252799  | -1.875268833 |
| C | -0.654226807 | 1.317312872  | -1.157533496 |
| C | 0.328506237  | 2.269591579  | -0.751106017 |
| C | 2.576935100  | 2.183741434  | 0.000924858  |
| C | 0.328489154  | 2.268981797  | 0.753133787  |
| C | 1.709295908  | 2.158498129  | 1.180097037  |
| C | -1.571639882 | 0.874936536  | 0.000400006  |
| C | 3.441133026  | 1.026530043  | 0.000413649  |
| C | 3.167698442  | 0.278222525  | -1.222040060 |
| C | 2.826737571  | -1.138542939 | -1.232905005 |
| C | 3.167713592  | 0.277193223  | 1.222256869  |
| C | 2.826777693  | -1.139583544 | 1.231905559  |
| C | 2.630469518  | -1.919786822 | -0.000839524 |
| C | 2.104216153  | 1.010781463  | 1.955863587  |
| C | 0.535089445  | -1.989423225 | -1.242593944 |
| C | 1.574431477  | -1.269854256 | -1.995689953 |
| C | -0.598493822 | -1.060161972 | -1.186028458 |
| C | 1.191380038  | -2.482631180 | -0.001092901 |
| C | 1.127357200  | 0.051812286  | -2.372888100 |
| C | 2.104175348  | 1.012438698  | -1.955032741 |
| C | 0.535129969  | -1.990405510 | 1.240854555  |
| C | 1.574480225  | -1.271497484 | 1.994577268  |
| C | -0.654341189 | 1.316407995  | 1.158780714  |
| C | -0.231604947 | 0.168742021  | 1.875496925  |
| C | 1.127407456  | 0.049828270  | 2.372967159  |
| C | -0.598359014 | -1.061050593 | 1.185085506  |
| C | -1.526821585 | -0.773651804 | -0.000287345 |
| V | 1.193218998  | -0.540260851 | -0.000296873 |
| C | -2.817123727 | -1.622532308 | 0.000129648  |
| F | -3.554346456 | -1.401517631 | -1.092979232 |
| F | -2.426556002 | -2.920991262 | -0.002929117 |
| F | -3.550280893 | -1.405668026 | 1.096853111  |
| C | -2.944376636 | 1.588307606  | -0.000127688 |
| F | -2.723023106 | 2.918044766  | 0.002919128  |
| F | -3.648431789 | 1.276344361  | -1.096554248 |
| F | -3.652110376 | 1.271836904  | 1.092630076  |

[V@C28]<sup>-</sup> - [CF<sub>3</sub>]<sub>2</sub>

37

Isomer: 2

|   |             |             |             |
|---|-------------|-------------|-------------|
| C | 1.15846800  | 2.14427700  | -0.04993900 |
| C | 2.02927000  | -0.29842600 | 1.31858800  |
| C | 2.34982200  | 0.00988000  | -0.06695600 |
| C | 2.15916200  | 1.31020700  | -0.86176100 |
| C | -0.01785700 | 2.37564100  | -0.81015300 |
| C | 1.19693900  | 0.78494800  | -2.03465900 |
| C | -0.04300500 | 1.47550400  | -1.97873700 |
| C | 1.85772900  | -1.07369200 | -0.84930700 |
| C | -1.19366400 | 2.13913700  | -0.00086800 |
| C | -0.72457500 | 1.84868500  | 1.34731100  |
| C | -1.16285800 | 0.66821400  | 2.07879500  |
| C | -1.98426800 | 1.15058600  | -0.70008400 |
| C | -2.44963100 | -0.02971200 | -0.00617000 |
| C | -1.96692600 | -0.29681700 | 1.34204500  |
| C | -1.30196200 | 0.75857700  | -1.95471600 |
| C | 0.02595400  | -1.43087500 | 2.09371200  |
| C | 0.04068900  | -0.02998900 | 2.61442500  |
| C | 1.26615200  | -1.61627200 | 1.31535400  |
| C | -1.21647400 | -1.58934100 | 1.30700300  |
| C | 1.24947500  | 0.68205800  | 2.09894000  |
| C | 0.77007500  | 1.84139200  | 1.31543600  |
| C | -1.28303000 | -2.07206000 | -0.06021600 |
| C | -2.06770400 | -1.16426200 | -0.81877900 |
| C | 1.13247800  | -0.65087600 | -2.02972300 |
| C | -0.08071600 | -1.42149800 | -2.03999100 |
| C | -1.29700400 | -0.69009700 | -1.98398600 |
| C | -0.05974900 | -2.52174100 | -0.87106800 |
| C | 1.16125100  | -2.04270100 | -0.07195500 |
| V | 0.12768700  | -0.07540500 | 0.65377300  |
| C | -0.03760400 | -3.99574100 | -1.31372000 |
| F | 1.07226400  | -4.24041700 | -2.02894300 |
| F | -0.04198500 | -4.78982300 | -0.22674800 |
| F | -1.11539500 | -4.26919300 | -2.06236800 |
| C | 3.44944600  | 2.02641700  | -1.29911400 |
| F | 3.15159000  | 3.10003800  | -2.04442700 |
| F | 4.13371900  | 2.42152800  | -0.20926800 |
| F | 4.21564800  | 1.18830200  | -2.01584900 |

[V@C28]<sup>-</sup> - [CF<sub>3</sub>]<sub>2</sub>

37

Isomer: 3

|   |            |             |             |
|---|------------|-------------|-------------|
| C | 1.20832700 | 2.19827300  | -0.16214900 |
| C | 2.00953200 | -0.21697900 | 1.24860900  |
| C | 2.40986700 | 0.04391500  | -0.12210300 |

|   |             |             |             |
|---|-------------|-------------|-------------|
| C | 2.00339100  | 1.20964000  | -0.85388900 |
| C | 0.00938700  | 2.40801200  | -0.94932900 |
| C | 1.25300800  | 0.74869600  | -2.06869100 |
| C | 0.00282000  | 1.45497600  | -2.08009400 |
| C | 1.98138000  | -1.12374800 | -0.89205400 |
| C | -1.14559600 | 2.18073000  | -0.13566400 |
| C | -0.70981400 | 1.90027700  | 1.22756000  |
| C | -1.17937800 | 0.76167300  | 2.02673300  |
| C | -1.91068900 | 1.12230600  | -0.79139800 |
| C | -2.36761600 | -0.00824000 | -0.06764000 |
| C | -1.97832200 | -0.25442400 | 1.31443700  |
| C | -1.23100800 | 0.70889600  | -2.03710700 |
| C | 0.03440800  | -1.35139800 | 2.08125200  |
| C | 0.03438100  | 0.07549800  | 2.54655400  |
| C | 1.26420500  | -1.52383800 | 1.28004500  |
| C | -1.21552500 | -1.56175300 | 1.31305600  |
| C | 1.22497300  | 0.77037800  | 1.97516900  |
| C | 0.78167800  | 1.92684500  | 1.21554500  |
| C | -1.17766200 | -2.01834500 | -0.05244600 |
| C | -2.17729700 | -1.26199300 | -0.92699200 |
| C | 1.22252300  | -0.69880500 | -2.05381900 |
| C | -0.01182000 | -1.44692900 | -2.02252500 |
| C | -1.22569300 | -0.73609100 | -2.02457000 |
| C | 0.02417500  | -2.52131500 | -0.84593200 |
| C | 1.25909400  | -2.03204200 | -0.08186400 |
| V | -0.06204400 | -0.07061300 | 0.58863200  |
| C | -3.48579200 | -1.95529600 | -1.35690200 |
| F | -4.30490000 | -1.04270300 | -1.91209600 |
| F | -3.25372800 | -2.92659500 | -2.24586600 |
| F | -4.08800200 | -2.47958700 | -0.27304800 |
| C | 0.06665800  | -4.01199000 | -1.23536800 |
| F | 1.17061300  | -4.25540700 | -1.96225000 |
| F | 0.10759100  | -4.75690400 | -0.11402500 |
| F | -1.01250800 | -4.35611600 | -1.94865600 |

[V@C28]· - [CF<sub>3</sub>]<sub>2</sub>

37

Isomer: 4

|   |            |             |             |
|---|------------|-------------|-------------|
| C | 1.20617700 | 2.07642000  | -0.11280900 |
| C | 1.99313600 | -0.28570100 | 1.19924500  |
| C | 2.47592100 | -0.06046200 | -0.15169400 |
| C | 2.00666900 | 1.13395600  | -0.82312000 |
| C | 0.02620200 | 2.54201300  | -0.97763800 |
| C | 1.26010600 | 0.71497900  | -2.05014000 |
| C | 0.02671100 | 1.43043400  | -2.05955900 |

|   |             |             |             |
|---|-------------|-------------|-------------|
| C | 2.06458500  | -1.19970300 | -0.94429200 |
| C | -1.15674600 | 2.12710800  | -0.07749000 |
| C | -0.73132900 | 1.89685100  | 1.32222600  |
| C | -1.20986800 | 0.70823200  | 2.09014700  |
| C | -1.88151100 | 1.08873800  | -0.73434000 |
| C | -2.42072400 | -0.05304600 | -0.07066900 |
| C | -2.00562300 | -0.30122800 | 1.32907600  |
| C | -1.19022500 | 0.68403300  | -1.98902100 |
| C | 0.03495900  | -1.39527900 | 1.96898200  |
| C | 0.03068200  | -0.00969700 | 2.49987400  |
| C | 1.24177100  | -1.58178000 | 1.20334100  |
| C | -1.23226600 | -1.58726100 | 1.26291800  |
| C | 1.23380300  | 0.67255200  | 1.96251800  |
| C | 0.76881900  | 1.86436600  | 1.25212900  |
| C | -1.20275000 | -2.07866300 | -0.09976300 |
| C | -2.19543500 | -1.29002100 | -0.96560700 |
| C | 1.25505900  | -0.73390800 | -2.07030600 |
| C | 0.00026100  | -1.45809500 | -2.04331700 |
| C | -1.23347100 | -0.74325000 | -2.05271700 |
| C | 0.01095200  | -2.30839300 | -0.81229300 |
| C | 1.28246400  | -2.11898700 | -0.14521100 |
| V | -0.22661300 | 0.13339900  | 0.52012700  |
| C | -3.45273800 | -2.04266700 | -1.43066300 |
| F | -4.23299800 | -1.22422400 | -2.15358200 |
| F | -3.10644600 | -3.10030200 | -2.18032300 |
| F | -4.14257500 | -2.47134700 | -0.35657200 |
| C | 0.05337600  | 4.00490600  | -1.44961600 |
| F | 0.08556100  | 4.82156700  | -0.37941000 |
| F | 1.14125400  | 4.22637100  | -2.20322700 |
| F | -1.04652600 | 4.27199400  | -2.17085200 |
